# Supplementary material for: Visible-light-driven cuprous oxide nanomotors with surface-heterojunction-induced propulsion
Source: Royal Society of Chemistry journal article supplement (doi:10.1039/d0nh00663g), 2021-01-01
Supplement: d0nh00663g1.pdf [file d0nh00663g1.pdf]

## **Visible-Light-Driven Cuprous Oxide Nanomotors with Surface Heterojunction-Induced Propulsion**

Wenjuan Liu,<sup>\*ab</sup> Xiao Chen,<sup>a</sup> Xiaoyong Ding,<sup>a</sup> Qiang Long,<sup>a</sup> Xiaolong Lu,<sup>\*c</sup> Qiang Wang<sup>d\*</sup> and Zhongwei Gu<sup>ab</sup>

<sup>a</sup> College of Materials Science and Engineering, Nanjing Tech University, Nanjing 211816, China

<sup>b</sup> Jiangsu Collaborative Innovation Center for Advanced Inorganic Functional Composites, Nanjing Tech University, Nanjing 211816, China

<sup>c</sup> State Key Laboratory of Mechanics and Control of Mechanical Structures, Nanjing University of Aeronautics and Astronautics, Nanjing 210016, China

<sup>d</sup> School of Chemistry and Molecular Engineering Nanjing Tech University, Nanjing 211810, China

### **Corresponding authors:**

Wenjuan Liu: liuwenjuan@njtech.edu.cn

Xiaolong Lu: long\_8446110@nuaa.edu.cn

Qiang Wang: wangqiang@njtech.edu.cn

**Video S1:** Movement of truncated octahedral and spherical Cu<sub>2</sub>O micro/nanomotors in ultra-pure water and 0.01% H<sub>2</sub>O<sub>2</sub> solution under ambient light.

**Video S2:** Cu<sub>2</sub>O nanomotors in ultra-pure water under different light sources.

**Video S3:** Cu<sub>2</sub>O nanomotors in 0.01% H<sub>2</sub>O<sub>2</sub> under different light sources.

**Video S4:** Negative phototactic behavior of Cu<sub>2</sub>O nanomotors in different solutions under blue point light source.

### **Possible photocatalytic mechanism**

Owing to the limited penetration depth of light in semiconductor, asymmetric concentration gradients of photocatalytic products will be generated on the surface of the photocatalyst under visible light irradiation, producing the autonomous motion of corresponding motors in the form of diffusiophoresis.<sup>1,2</sup> Analogously, Cu<sub>2</sub>O crystals can create holes (h<sup>+</sup>) and electrons (e<sup>-</sup>) within the visible region of the spectrum. Moreover, it is well recognized that Cu<sub>2</sub>O has a strong adsorption capacity for oxygen molecules (O<sub>2</sub>).<sup>3</sup> The photogenerated electrons migrated to the crystal surface can react with the adsorbed O<sub>2</sub> to produce superoxide anion free radicals ( $\cdot\text{O}_2^-$ ). The  $\cdot\text{O}_2^-$  reaction

with  $\text{H}_2\text{O}$  can further result in the formation of hydroxyl ions ( $\text{OH}^-$ ) and hydroxyl radicals ( $\cdot\text{OH}$ ). Meanwhile, the photogenerated holes accumulated on the facets of the  $\text{Cu}_2\text{O}$  crystals can react with  $\text{OH}^-$  to generate  $\cdot\text{OH}$ . The possible catalytic cycle is given below:

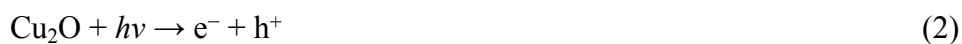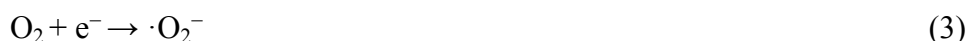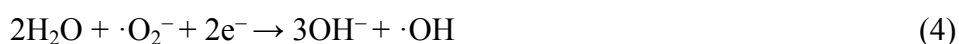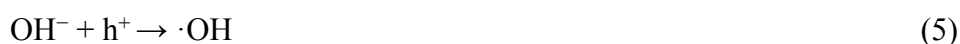

Thus, ideally, without any additional surface modification, single-component  $\text{Cu}_2\text{O}$  micro/nanomotors could present good optical response in the visible light range. However, photocorrosion effect leads to a poor photogenerated charges separation/transport capability of  $\text{Cu}_2\text{O}$ , thereby reducing its photocatalytic activity. As mentioned above, apart from forming heterojunction with other materials, engineering crystal facet is also helpful to improve  $\text{Cu}_2\text{O}$  performance.

## References

- [1] J. Wang, Z. Xiong, J. Zheng, X. Zhan and J. Tan, *Acc. Chem. Res.*, 2018, **51**, 1957-1965.
- [2] W. Wang, W. Duan, S. Ahmed, T. E. Mallouk, A. Sen, *Nano Today*, 2013, **8**, 531-554.
- [3] L. Tang, J. Lv, S. Sun, X. Zhang, C. Kong, X. Song, Z. Yang, *New J. Chem.*, 2014, **38**, 4656-4660.

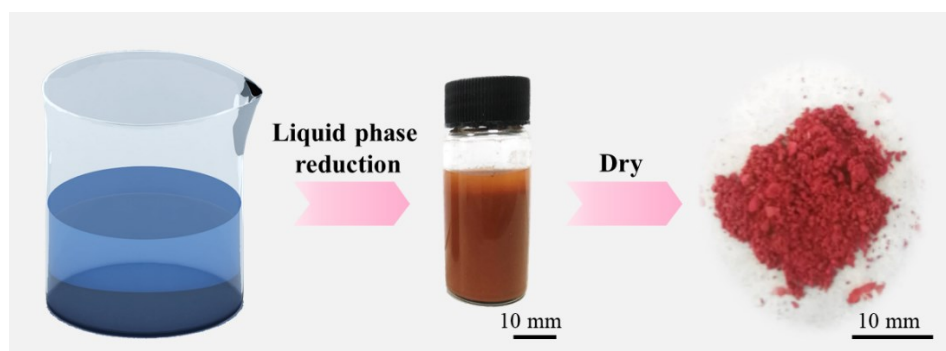

**Fig. S1** Schematic diagram of preparation process and optical photo of  $\text{Cu}_2\text{O}$  particulates.

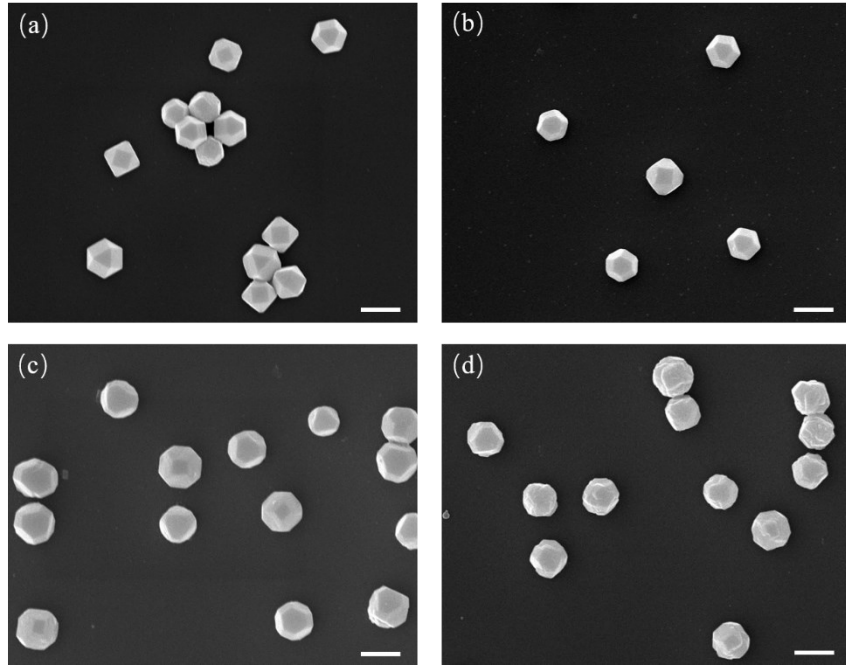

**Fig. S2** SEM of  $\text{Cu}_2\text{O}$  micro/nanomotor synthesized by different dosage of PVP 0.5 g (a), 1.0 g (b), 1.8 g (c), 3.5 g (d), respectively. Scale bar: 1  $\mu\text{m}$ .

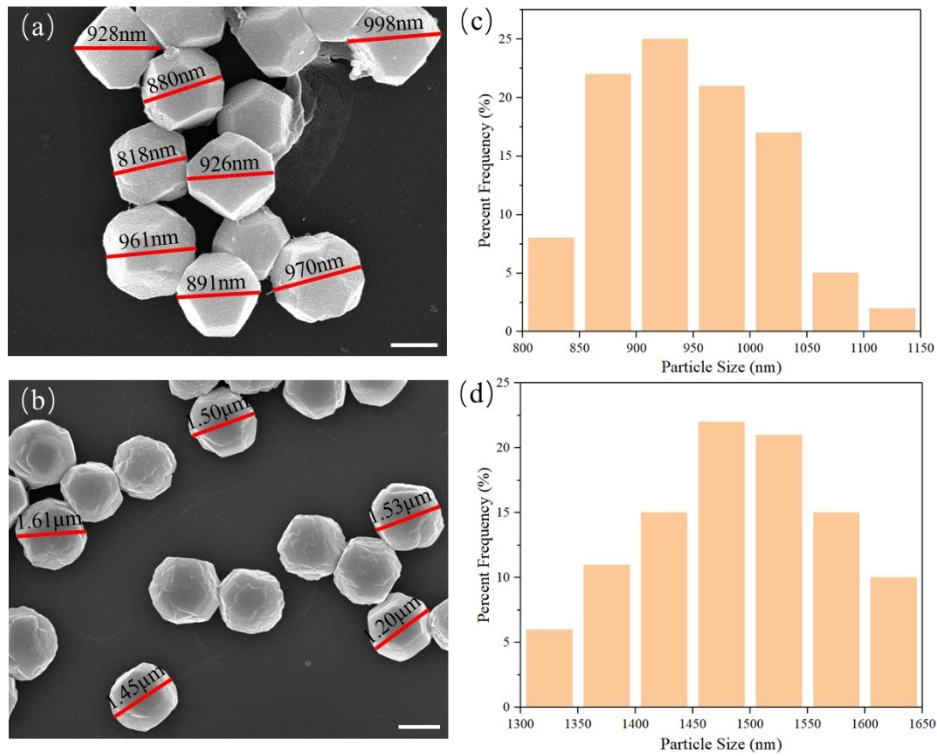

**Fig. S3** Size distribution histograms for truncated octahedral  $\text{Cu}_2\text{O}$  nanomotors (a) and spheroidal  $\text{Cu}_2\text{O}$  micromotors (b).

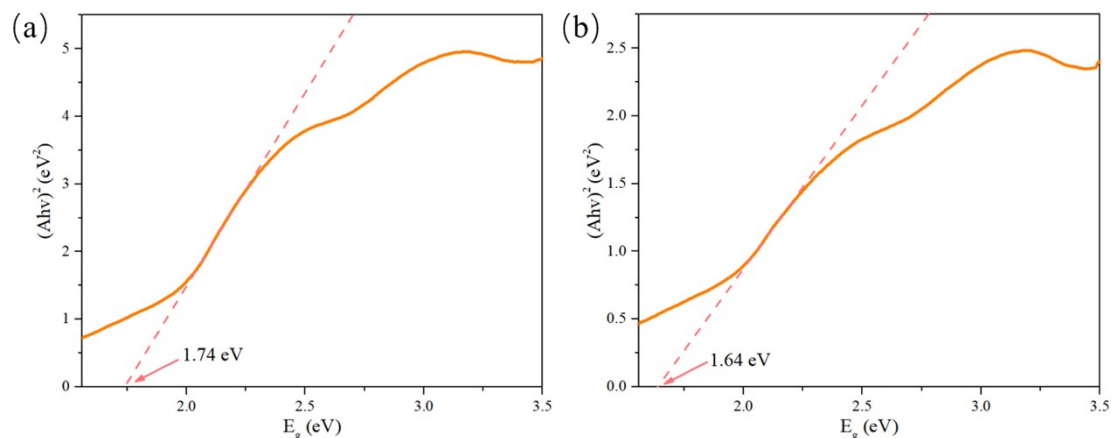

**Fig. S4** Band gap energy of  $\text{Cu}_2\text{O}$  micro/nanomotors with spherical (a) and truncated octahedral structure (b), respectively.

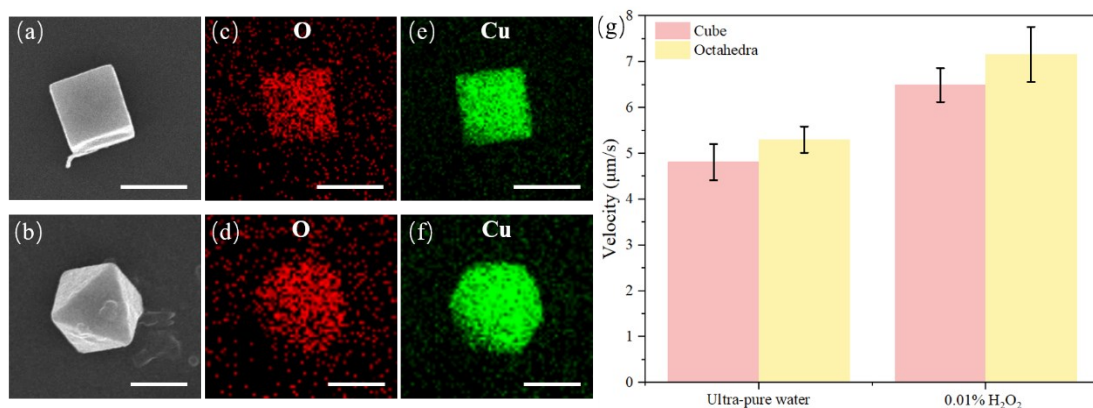

**Fig. S5** SEM images of  $\text{Cu}_2\text{O}$  micro/nanomotors with cubic (a) and octahedral structures (b). EDX mapping images for O and Cu elemental distribution of cubic (c)&(e) and octahedral (d)&(f)  $\text{Cu}_2\text{O}$  micro/nanomotors, respectively. (g) Velocity of cubic and octahedral  $\text{Cu}_2\text{O}$  motors in ultra-pure water and 0.01 v%  $\text{H}_2\text{O}_2$  solution under ambient light exposure.

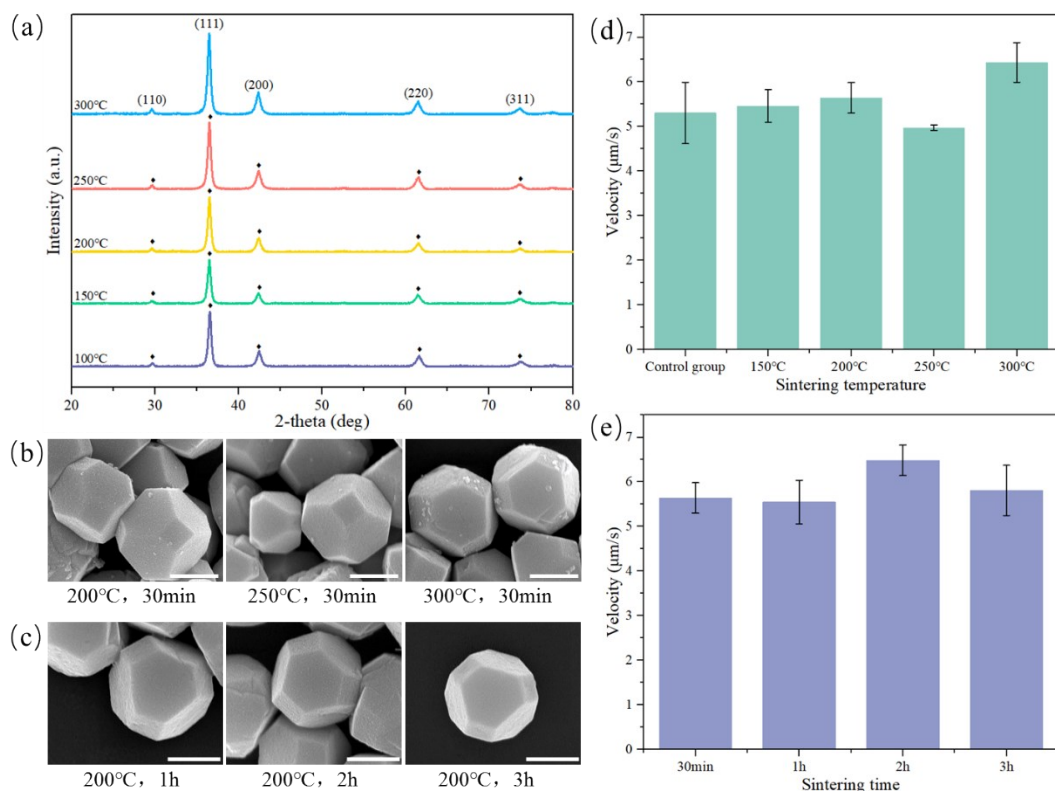

**Fig. S6** Influence of heat treatment on the structure and motion speed of truncated octahedral Cu<sub>2</sub>O nanomotors. XRD patterns of Cu<sub>2</sub>O nanomotors after heat treatment at different sintering temperature for 30 min (a); SEM images of Cu<sub>2</sub>O nanomotors after different heat treatment process: different sintering temperature for 30 min (b), different sintering time at 200 °C (c); Speed of Cu<sub>2</sub>O nanomotors under ambient light in pure water after different heat treatment process: different sintering temperature for 30 min (d), different sintering time at 200 °C (e). Scale bar: 500 nm.

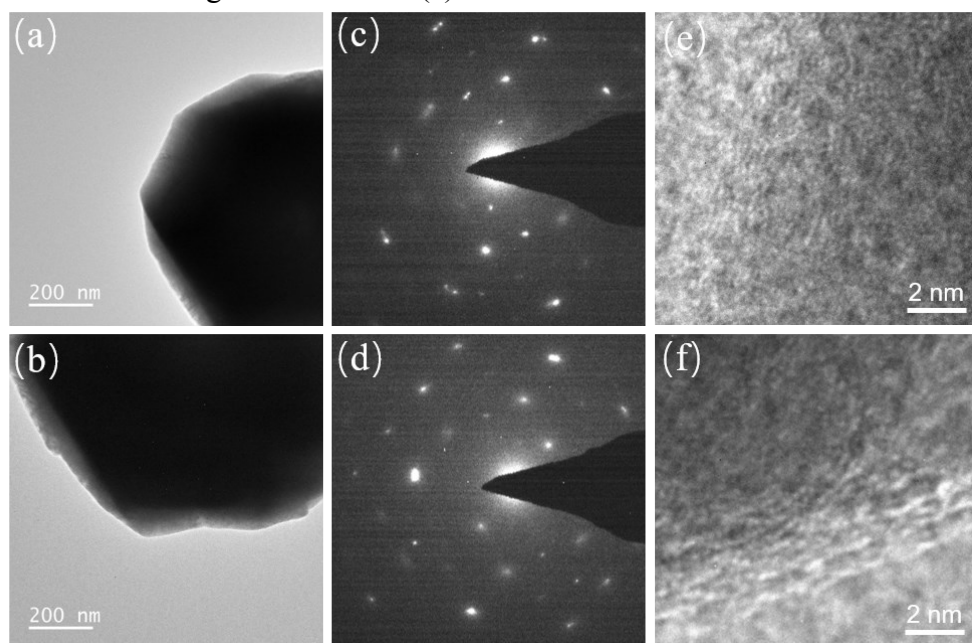

**Fig. S7** Detailed morphology and crystal structure for spherical Cu<sub>2</sub>O micromotors. TEM images (a, b), SAED patterns (c, d), and high-resolution TEM images (e, f).



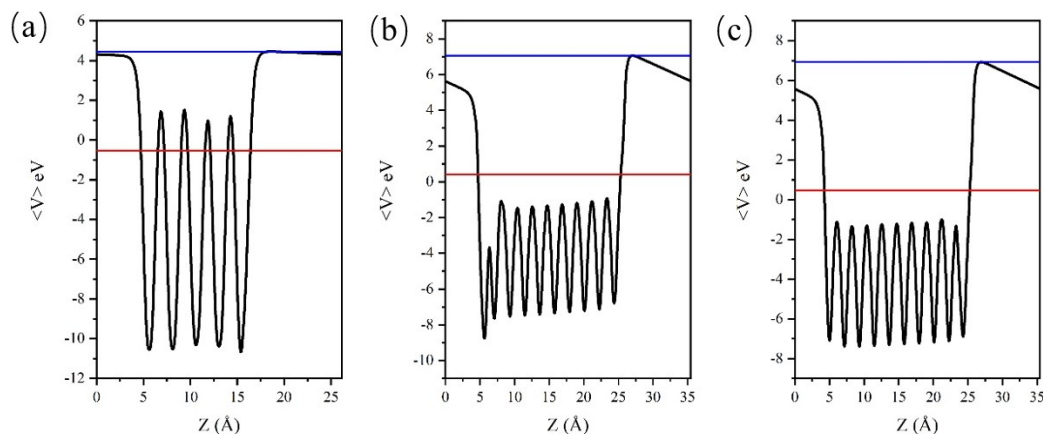

**Fig. S8** Work function of  $\text{Cu}_2\text{O}(111)$  (a),  $(100)\text{Cu}$  (b) and  $(100)\text{O}$  (c) surfaces.

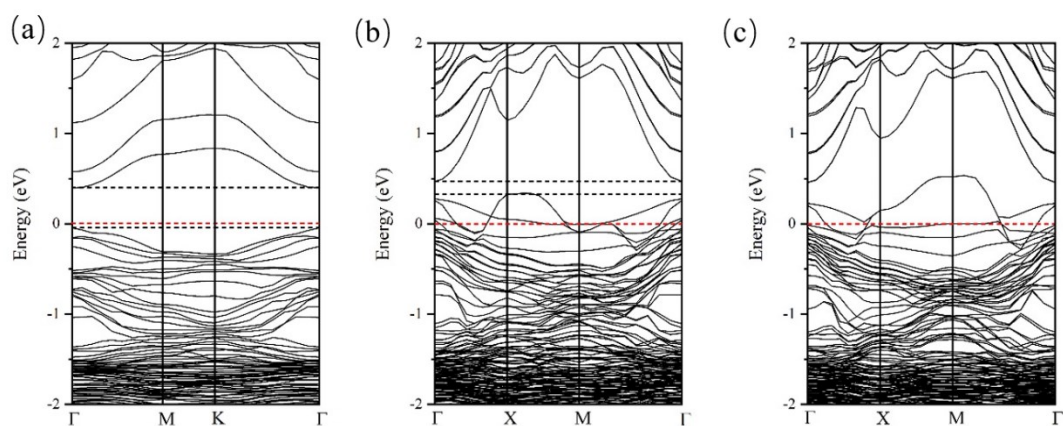

**Fig. S9** Energy band structures of  $\text{Cu}_2\text{O}(111)$  (a),  $(100)\text{Cu}$  (b) and  $(100)\text{O}$  (c) surfaces.

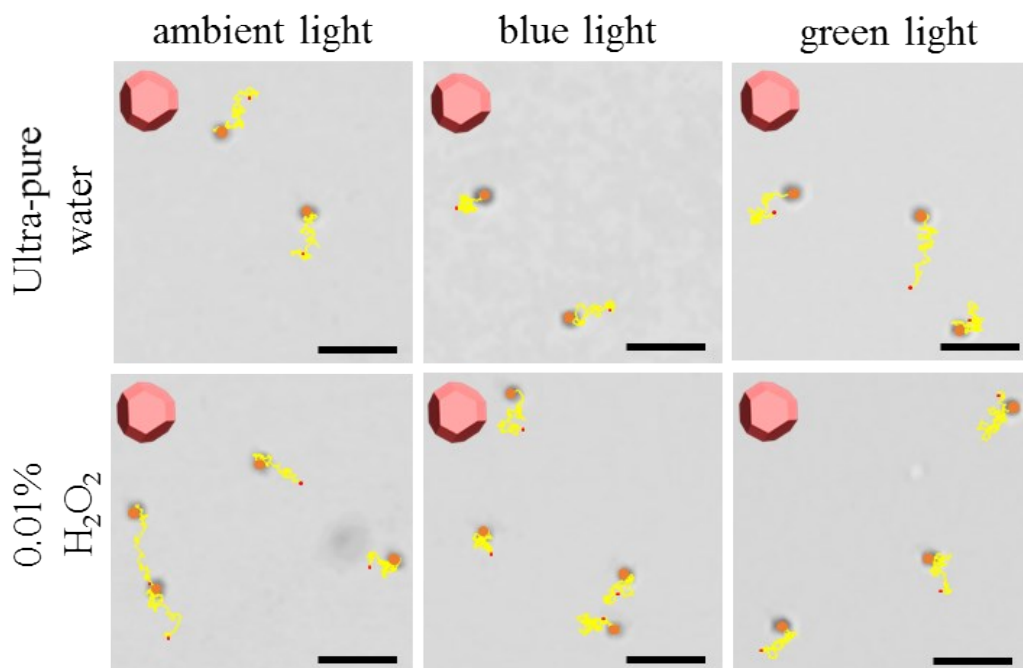

**Fig. S10** The imposed video images to illustrate the trajectories of truncated octahedral  $\text{Cu}_2\text{O}$  nanomotors in pure water and in 0.01 v%  $\text{H}_2\text{O}_2$  solution over 3 seconds. Scale bar: 5  $\mu\text{m}$ .

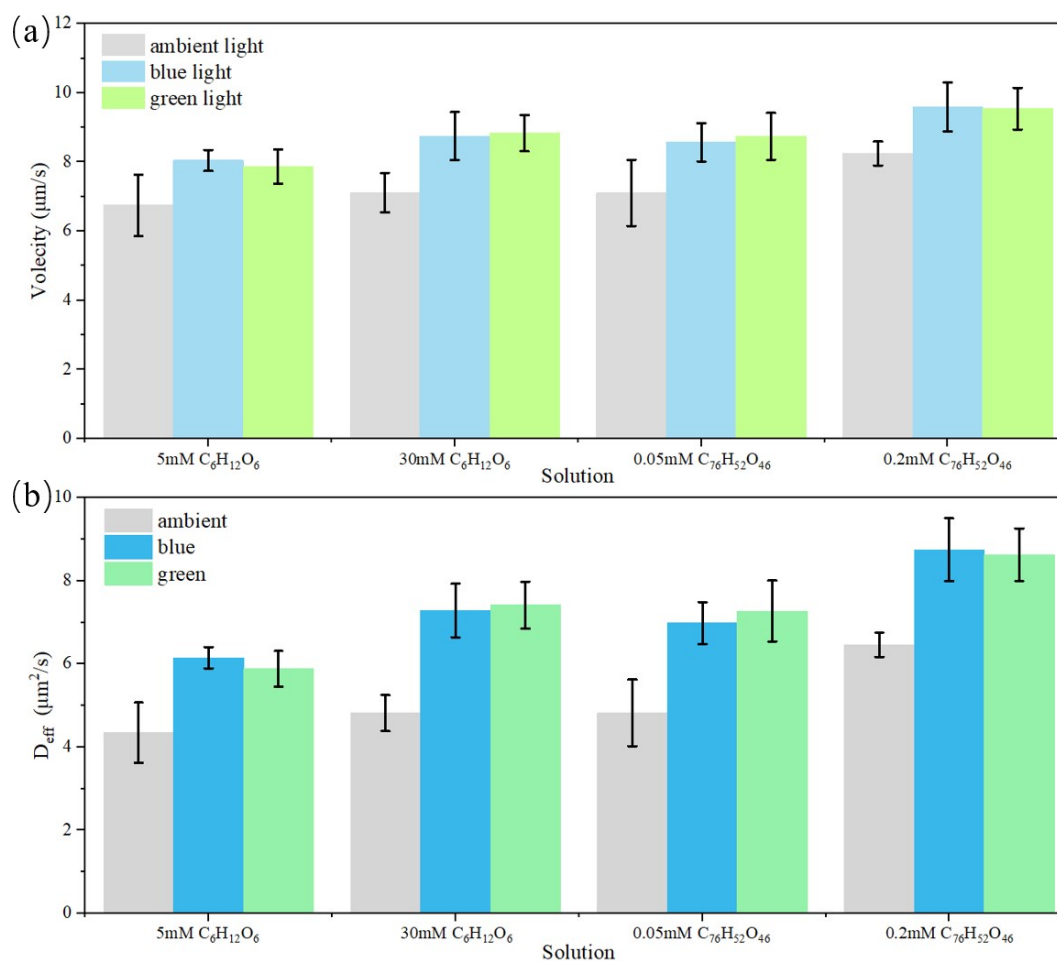

**Fig. S11** Velocity (a) and effective diffusion coefficient (b) of truncated octahedral  $\text{Cu}_2\text{O}$  nanomotors in various concentration glucose and tannic acid solutions after exposure of visible light (ambient light, blue light, green light).

**Table S1** The lattice constants obtained experimental values. All values are given in Å. a, b, and c are the lattices lengths.  $\alpha$ ,  $\beta$  and  $\gamma$  are angles.

| System                         | a    | b    | $\alpha$ | $\beta$ | $\gamma$ |
|--------------------------------|------|------|----------|---------|----------|
| $\text{Cu}_2\text{O}(1\ 1\ 1)$ | 6.10 | 6.10 | 90       | 90      | 120      |
| $\text{Cu}_2\text{O}(1\ 0\ 0)$ | 4.31 | 4.31 | 90       | 90      | 90       |
| $\text{Cu}_2\text{O}(2\ 0\ 0)$ | 4.31 | 4.31 | 90       | 90      | 90       |
| $\text{Cu}_2\text{O}(1\ 1\ 0)$ | 4.31 | 6.10 | 90       | 90      | 90       |

**Table S2** Averaged electrostatic potential of the Cu-terminated and O-terminated  $\text{Cu}_2\text{O}$  slabs as a function of z-direct coordinate. The vacuum level was shifted to the zero point. The work function ( $\Phi$ )  $\Phi = E_{\text{vac}} - E_{\text{F}}$ .

|                  | $\text{Cu}_2\text{O}(1\ 1\ 1)$ | $\text{Cu}_2\text{O}(1\ 0\ 0)_{\text{Cu}}$ | $\text{Cu}_2\text{O}(1\ 0\ 0)_{\text{O}}$ |
|------------------|--------------------------------|--------------------------------------------|-------------------------------------------|
| $E_{\text{vac}}$ | 4.45                           | 7.06                                       | 6.93                                      |
| $E_{\text{F}}$   | -0.53                          | 0.42                                       | 0.48                                      |
| $\Phi$           | 4.98                           | 6.64                                       | 6.45                                      |

**Table S3** The energy band of the Cu-terminated and O-terminated Cu<sub>2</sub>O slabs. The Band gap ( $\Phi$ )  $E_g = E_{\text{cbm}} - E_{\text{vbm}}$

|                       | Cu <sub>2</sub> O(1 1 1) | Cu <sub>2</sub> O(1 0 0) <sub>Cu</sub> | Cu <sub>2</sub> O(1 0 0) <sub>O</sub> |
|-----------------------|--------------------------|----------------------------------------|---------------------------------------|
| $E_{\text{Fermi}}$    | -0.53                    | 0.42                                   | 0.48                                  |
| $E_{\text{cbm}}$      | 0.40                     | 0.47                                   | -                                     |
| $E_{\text{vbm}}$      | -0.04                    | 0.33                                   | -                                     |
| $E_{\text{band-gap}}$ | 0.44                     | 0.14                                   | -                                     |
